# Supplementary material for: Single domain Camelid antibody fragments for molecular imaging and therapy of cancer
Source: Front Oncol. 2023 Sep 8;13:1257175. doi: 10.3389/fonc.2023.1257175 (PMC10514897; doi:10.3389/fonc.2023.1257175)
Supplement: Supplementary file 2 [file Table_2.xlsx]

## Sheet: Sheet1
Title of article	Authors	Year	Reference	Topic of investigation	Types of cancer	Molecular target	Types of therapy	radionuclide/ fluorescent group	Therapeutic agents (VHHs)	Experimental control	Type of experimental model	Experimental models	conclusion	Positive findings	Kidneys uptake	liver uptake	toxicity	immunogenicity
Specific Cell Targeting with Nanobody Conjugated Branched Gold Nanoparticles for Photothermal Therapy	B. Van de Broek et al.	2011	81	photodynamic therapy	ovarian cancer	human epidermal growth factor receptor 2 (HER2)	photothermal therapy	gold nanoparticles	anti-HER2 conjugated branched gold nanoparticles	anti-PSA VHHs; VHHs only; laser only	in vitro	HER2 Positive ovarian cancer cells	effective anti-cancer treatment	↑binding specificity; ↑tumor cell death	//	//	//	//
EGFR targeted nanobody-photosensitizer conjugates for photodynamic therapy in a pre-clinical model of head and neck cancer	P. van Driel et al.	2016	82	photodynamic therapy	head and neck cancer	epidermal growth factor receptor (EGFR)	photodynamic therapy	IRDye700DX	VHHs-photosensitizer (PS) conjugates	irrelevant VHHs; Cetuximab-PS	in vitro, in vivo	the well differentiated squamous cell carcinoma of the tongue OSC-19-luc2-cGFP (high EGFR overexpression); The human cervical cancer cell line HeLa (intermediate EGFR expression); orthotopic mouse tumor model in Nude Balb/c female mice	selective and is able to induce tumor cell death in vivo	tumor specificity in vivo ; pronounced in vivo tumor necrosis (approx. 90%); no toxicity in healthy tissues;	//	//	almost no toxicity in healthy tissues	//
The effect of subcellular localization on the efficiency of EGFR-targeted VHH photosensitizer conjugates	S.A.M. van Lith et al.	2018	83	photodynamic therapy	ovarian cancer	epidermal growth factor receptor (EGFR)	photodynamic therapy	IRDye700DX	VHHs-conjugates of photosensitizers (PS)	VHHs conjugated to both photosensitizers (PS) and cell-penetrating peptide (CPP)	in vitro, ex vivo	human epidermoid carcinoma A431 cells; human high grade astrocytoma E98 cells; human ovarian adenocarcinoma SK-OV-3 cells; SK-OV-3 cells as tumor spheroids; ascites-derived cells from patients with ovarian cancer	specifically induce cell death of EGFR expressing cancer cells	binding specificity; tissue penetration; efficient tumor cell killing;	//	//	//	//
VHH-Photosensitizer Conjugates for Targeted Photodynamic Therapy of Met-Overexpressing Tumor Cells	R. Heukers et al.	2019	79	photodynamic therapy	gastric cancer; human ovarian carcinoma	the hepatocyte growth factor receptor ( Met)	photodynamic therapy	IRDye700DX	anti-Met VHH-photosensitizers (PS)	anti-Met antibody Telisotuzumab	in vitro	met-overexpressing human gastric cancer cell line MKN45; The human ovarian carcinoma cell line TOV112D;	specifically killed MKN45 cells with nanomolar potency	↑binding affinity;	//	//	//	//
Nanobody-photosensitizer conjugates for targeted photodynamic therapy	R. Heukers et al.	2014	80	photodynamic therapy	EGFR positive cancer	epidermal growth factor receptor (EGFR)	photodynamic therapy	IRDye700DX	anti-EGFR VHHs 7D12	non-relevant VHHs R2	in vitro	the human head and neck squamous cell carcinoma cell line UM-SCC-14C; the human epithelial carcinoma cell line A431; the human cervical carcinoma cell line HeLa; The mouse fibroblast cell line NIH 3T3 2.2	specific and potent, enabling the combination of molecular imaging with cancer therapy	↑binding specificity; ↑tumor cell killing;	//	//	//	//
Targeting Breast Carcinoma with Radioiodinated Anti-HER2 Nanobody	M. Pruszynski et al.	2013	105	targeted radionuclide therapy with VHHs	breast carcinoma	human epidermal growth factor receptor 2 (HER2)	radiolabeled molecular targeted therapy	125I and 131I	[131I]IB-Mal-D-GEEEK-VHHs	[125I]I-VHHs	in vitro, in vivo	human breast carcinoma cells SKBR3; The human breast carcinoma cell line BT474M1; BT474M1 xenograft-bearing mice	better tumor targeting properties	↑tumor uptake; ↑blood clearance; ↓accumulation in non-target organs except kidneys; ↑tumor-to-blood; ↑tumor-to-tissue	high kidneys accumulation	//	nephrotoxicity	//
The Road to Personalized Myeloma Medicine: Patient-specific Single-domain Antibodies for Anti-idiotypic Radionuclide Therapy	J. Puttemans et al.	2022	106	targeted radionuclide therapy with VHHs	multiple myeloma	5T33MMid	targeted radionuclide therapy	177Lu and 225Ac	anti-5T33MMid VHHs	Anti-5T2MMid VHHs	in vitro, ex vivo, in vivo	5T33MMvivo cells; 5T33MMvitro cells; C57BL/KalwRij mice with 5 × 105 5T33MMvivo cells	significantly delayed tumor progression	↑high affinity; ↑high specificity; ↓tumor burden	high kidneys uptake	//	nephrotoxicity	//
Stromal-targeting radioimmunotherapy mitigates the progression of therapy-resistant tumors	E. Bolli et al.	2019	102	targeted radionuclide therapy with VHHs	breast cancer	macrophage mannose receptor (MMR)	radioimmunotherapy	177Lu	177Lu-anti-MMR VHH	177Lu-labelled VHH; unlabeled anti-MMR VHH	ex vivo, in vivo	balb/c mammary adenocarcinoma TS/A	anti-MMR STRIT is a valid anti-cancer treatment	↑inhibition of off-target toxicity; ↑inhibition of tumor growth;	high kidneys uptake	high liver uptake	therapy-induced toxicity	//
131I-labeled Anti-HER2 Camelid sdAb as a Theranostic Tool in Cancer Treatment	D’Huyvetter et al.	2017	103	targeted radionuclide therapy with VHHs	breast cancer	human epidermal growth factor receptor 2 (HER2)	targeted radionuclide therapy	131I	anti-HER2 VHH [131I ]SGMIB-2Rs15d	Trastuzumab	in vitro, in vivo	breast cancer cell line HER2+ BT474/M1; C57Bl/6 mice with breast cancer cell line HER2+ BT474/M1	These findings demonstrate the theranostic potential of [131I]SGMIB-2Rs15d	↑specificity; ↑affinity; ↑cellular internalization; ↑High and specific tumor uptake; ↑significantly extended median survival	high kidneys uptake	//	No toxicity	//
Theranostic Radiolabeled Anti-CD20 sdAb for Targeted Radionuclide Therapy of Non-Hodgkin Lymphoma	Krasniqi et al.	2017	104	targeted radionuclide therapy with VHHs	non-hodgkin lymphoma	CD20	targeted radionuclide therapy	177Lu and 68Ga	anti-CD20 VHH 177Lu-DTPA-SdAb 9079	177Lu-DTPA-rituximab	in vitro, in vivo	Daudi (hCD20pos), Reh (hCD20neg), and hCD20pos B16 cell line; female C57BL6 and CB17 SCID mice with hCD20pos B16 or Daudi cells	sdAb 9079 displays promising features as a theranostic drug to treat CD20pos lymphomas	↑specificity; ↑affinity; ↑degree of internalization; high tumor uptake; ↑T/B; ↑T/M ratios; significantly prolonged median survival	significantly lower kidney accumulation	//	//	//
Nanobody-based CAR T cells that target the tumor microenvironment inhibit the growth of solid tumors in immunocompetent mice	Y.J. Xie et al.	2019	94	VHH-based immunotherapy	melanoma	EIIIB	chimeric antigen receptor (CAR) T cell therapy	//	PD-L1-targeted VHH-based CAR T	1B7 CAR T cells	in vitro, in vivo	PD-L1 overexpressing B16 melanoma cells; colon adenocarcinoma cell line, MC38; immunocompetent mice;	the flexibility of VHH-based CAR T cells and the potential of CAR T cells to target the tumor microenvironment and treat solid tumors.	↑binding specificity; ↑tumor growth; ↑improved survival; ↑cytotoxicity against cancer cells	//	//	//	Low levels of immunogenicity
Targeting CD38-Expressing Multiple Myeloma and Burkitt Lymphoma Cells In Vitro with Nanobody-Based Chimeric Antigen Receptors (Nb-CARs)	J. Hambach et al.	2020	91	VHH-based immunotherapy	multiple myeloma	CD38	immunotherapy	//	anti-CD38 VHHs-CAR-NK cell	anti-CD38 VHHs-CARs	in vitro	multiple myeloma (LP-1, RPMI-8226); Burkitt lymphoma cell lines (CA-46, Daudi)	CD38-specific VHH-CARs specifically lysed CD38-expressing tumor cells and depleted CD38-expressing multiple myeloma cells in primary human bone marrow samples	↑high affinity; ↑high specificity; ↑myeloma cells depletion	//	//	//	//
Single VHH-directed BCMA CAR-T cells cause remission of relapsed/refractory multiple myeloma	L. Han et al.	2021	92	VHH-based immunotherapy	multiple myeloma	B cell maturation antigen (BCMA)	immunotherapy	//	anti-BCMA VHHs CAR-T	control T cells	in vitro, in vivo, clinical patients	B-NDG (NOD-PrkdcscidIL2rgtm1) mice with MM.1S ;	promising efficacy and safety of single VHH-directed BCMA CAR-T cells, supporting further development of this BCMA CAR-T for clinical trial and application	↑binding affinity; ↑high specificity; ↑killing MM.1S (BCMA high level); ↑tumor cells elimination in mice; ↓specific toxicity	//	//	no specific toxicity; no neurotoxicity	//
Targeting cytokine therapy to the pancreatic tumor microenvironment using PD-L1 specific VHHs	M. Dougan et al.	2018	90	VHH-based immunotherapy	pancreatic cancer	programmed death-ligand 1 (PD-L1)	target cytokine therapy	//	anti-PDL1 VHHs fused with IL2; anti-PDL1 VHHs fused with IFNγ	irrelevant VHHs fused with IL2; commercial anti-PDL1 mAb 10F.9G2	in vitro, ex vivo, in vivo	Panc02 cells or KPC cells; Orthotopic pancreatic tumors; Pancreatic tumor organoids; Melanoma models	targeting of IFNγ to the tumor microenvironment	↑binding affinity; ↓accumulation in non target organs (spleen, lymph nodes, nor liver); ↓systemic toxicity; ↑half-life in serum; ↓tumor size; ↓tumor burden;	//	//	no systemic toxicity	//
Improved Antitumor Efficacy of Chimeric Antigen Receptor T Cells that Secrete Single-Domain Antibody Fragments	Y.J. Xie et al.	2020	93	VHH-based immunotherapy	melanoma	PD-L1; CTLA-4	immunotherapy	//	Anti-CD47 VHH-secreting anti–PD-L1 (A12) CAR T-cell	1B7 CAR T cell	In vitro, in vivo	melanoma cells B16F10;	enhance the antitumor response	↓tumor growth; ↑presence of innate immune cells; ↓toxicity;	//	//	avoided systemic toxicity	//
Neoleukin-2 enhances anti-tumour immunity downstream of peptide vaccination targeted by an anti-MHC class II VHH	S.J. Crowley et al.	2020	113	molecular targeted therapy	pancreatic cancer	MHC class II	personalized vaccines therapy	//	anti-MHC class II VHH clone DC15	irrelevant control VHH.	in vitro, in vivo	murine melanoma cell line B16F10; pancreatic ductal adenocarcinoma; B16 melanoma model;	induced CD8 T cell responses to a melanoma self-antigen	↑high affinity; ↑high specificity; ↑CD8 T cells activation; ↓tumour growth;	//	//	//	//
Nanobody-antigen conjugates elicit HPV-specific antitumor immune responses	A.W. Woodham et al.	2018	131	molecular targeted therapy	HPV-induced cancers	CD8	therapeutic cancer vaccine	//	VHHCD11b-E749–57	VHHCD11b; E749–57	in vitro, in vivo	C3.43 HPV16-transformed murine cell line; tumor-bearing mice with 3×105 C3.43 cells	VHHs can serve as a therapeutic cancer vaccine platform for HPV-induced cancers	↑binding affinity; ↑ binding specificity; ↑tumor-growth; ↑overall survival	//	//	//	poorly immunogenic
A Novel Bispecific Antibody with PD-L1-assisted OX40 Activation for Cancer Treatment	Z. Kuang et al.	2020	118	molecular targeted therapy	colon cancer	programmed death ligand-1	immunotherapy	//	anti-PDL1 VHHs fused to anti-OX40 antibody	IgG2	in vitro, in vivo	Human PD-L1–expressing Raji cells; Human PD-L1–expressing MC38 cell line; Human OX40 transgenic mice	a great potential for further clinical development of the potent immunostimulatory PD-L1/OX40 bispecific antibody.	↑binding affinity; ↑high specificity; ↑ antitumor activity in vivo;	//	//	no systemic toxicity	//
A HER2 Tri-Specific NK Cell Engager Mediates Efficient Targeting of Human Ovarian Cancer	D.A. Vallera et al.	2021	129	molecular targeted therapy	ovarian cancer	HER2	immunotherapy	//	CAM1615HER2 TriKE	control TriKE	In vitro, in vivo	ductal breast carcinoma cell MCF-7L; ovarian ascites SKOV3; breast carcinoma cell SK-BR-3; squamous cell carcinoma cell UMSCC-11B; ovarian carcinoma cell MA-148; xenogeneic mouse model with SKOV3	its efficacy in inducing potent anti-cancer effects in an in vivo xenograft model of human ovarian cancer engrafting both cancer cells and human NK cells	↑binding specificity; ↑binding affinity; ↑Tumor Control; ↑killing tumor cells	//	//	//	//
Humanized CD7 nanobody-based immunotoxins exhibit promising anti-T-cell acute lymphoblastic leukemia potential	Y. Yu et al.	2017	133	molecular targeted therapy	T-cell acute lymphoblastic leukemia	CD7	immunotherapy	//	dhuVHH6-PE38, dVHH6-PE-LR, and dhuVHH6-PE-LR	CD7 unrelated immunotoxin, dVHH22-RIT	In vitro, in vivo	human acute T-cell leukemia cell lines, CEM and Jurkat; two human B-cell lymphoma cell lines, Raji and Ramos; patient-derived xenograft model	its potential for treating CD7-positive malignant tumors, especially T-cell acute lymphoblastic leukemia	↑binding affinity; ↑binding specifically; ↑survival; ↑cell growth;	//	//	reduced nonspecific toxicity	//
Multivalent nanobodies targeting death receptor 5 elicit superior tumor cell killing through efficient caspase induction	H.A. Huet et al.	2014	116	molecular targeted therapy	pancreatic and colon tumor	death receptor 5 (DR5)	molecular targeted therapy	//	anti-DR5 multivalent Nanobody	conventional DR5 agonist	in vitro, in vivo	patient-derived primary pancreatic and colon tumor model;	responses to VHHs treatment were obtained in up to 50% of patient-derived primary pancreatic and colon tumor models,	↑ tumor regression; ↑death inducing signaling complex recruitment; ↑robust anti-tumor responses; ↑caspase-8 and caspase-3 activation	//	//	//	//
Llama-derived Single Variable Domains (Nanobodies) Directed against Chemokine Receptor CXCR7 Reduce Head and Neck Cancer Cell Growth in Vivo	D. Maussang et al.	2013	121	molecular targeted therapy	head and neck Cancer	chemokine receptor CXCR7	molecular targeted therapy	//	anti-CXCR7 VHHs	CXCR7-unrelated VHHs	in vitro, in vivo	CXCR7-expressing head and neck cancer xenograft model	reduced secretion of the angiogenic chemokine CXCL1	↑binding specificity; ↑binding affinity; ↓tumor growth in vivo;	//	//	no toxicity	//
Tumor-penetrating peptide fused EGFR single-domain antibody enhances cancer drug penetration into 3D multicellular spheroids and facilitates effective gastric cancer therapy	H. Sha et al.	2015	124	molecular targeted therapy	gastric cancer	epidermal growth factor receptor (EGFR)	molecular targeted therapy	//	anti-EGFR VHHs-iRGD	anti-EGFR VHHs; anti- EGFR monoclonal antibody cetuximab	in vitro, in vivo	human gastric adenocarcinoma cell line BGC-823; human epithelial colorectal adenocarcinoma cell line Caco-2; human breast adenocarcinoma cell line MCF-7 ; murine hepatic cancer cell line H22; BALB/c mice with BGC-823 gastric cancer cells	enhances cancer drug penetration capability and facilitates effective gastric cancer therapy	↑cytotoxicity for tumor cells; ↑enhancing tumor growth inhibition; ↑ enhance the penetration of drugs; ↑ inhibition of spheroid growth	//	//	//	//
A nanobody targeting the F-actin capping protein CapG restrains breast cancer metastasis	K. Van Impe et al.	2013	130	molecular targeted therapy	breast cancer	F-actin capping protein CapG	molecular targeted therapy	//	anti-CapG VHHs (CAPNb2)	CAPNb3; CAPNb4; CAPNb5; CAPNb6	in vitro, in vivo	human breast cancer cell line MDA-MB-231; orthotopic breast cancer lung-metastasis model with immunodeficient NOD-SCID mice	strongly reduces breast cancer metastasis	↑binding affinity; ↑binding specificity; ↑significantly reduces tumor cells migration in vitro; ↑markedly restrained the occurrence of lung metastases in vivo	//	//	//	//
A Novel Small Molecular Antibody, HER2-Nanobody, Inhibits Tumor Proliferation in HER2-Positive Breast Cancer Cells In Vitro and In Vivo	Y. Yan et al.	2021	132	molecular targeted therapy	breast cancer	human epidermal growth factor receptor 2 (HER2)	molecular targeted therapy	//	anti-HER2 VHHs	HSA-nanobody, NC-VHH	in vitro, in vivo	breast cancer cell line MCF-7, BT474 and SKBR3; female BALB/c-nu/nu mice;	Inhibited tumor proliferation in HER2-positive breast cancer cells In vitro and In vivo	↑high speificity; ↑high affinity; ↑cancer cell apoptosis; ↑tumor growth;	//	//	no off-target toxicity	//
Anti-EGFR VHH-armed death receptor ligand-engineered allogeneic stem cells have therapeutic efficacy in diverse brain metastatic breast cancers	Y. Kitamura et al	2021	117	molecular targeted therapy	breast cancers	epidermal growth factor receptor (EGFR); death-receptors 4/5 (DR4/5)	molecular targeted therapy	//	EVDRL [anti-EGFR VHH (EV) fused to DR ligand (DRL)]	EV, DRL, EV + DRL	in vitro, ex vivo, in vivo	patient-derived BLBC-BM cell lines BMET02, BMET05 and BMET15; BC cell lines MDA-MB-453, MCF7, HCC1500, HCC1428, ZR75-1, BT474, T47D, MDA-MB-175VII, and SUM159; Basal-like breast cancer brain metastatic (BLBC-BM) mouse model	alleviated tumor-burden and significantly increased survival in mouse models of residual-tumor	↑high specificity; ↑cancer cell apoptosis; ↑tumor-killing ability in vitro and in vivo;	//	//	no any significant toxicity	//
Inhibition of BMP2 and BMP4 Represses Barrett’s Esophagus While Enhancing the Regeneration of Squamous Epithelium in Preclinical Models	A. C.P. Correia et al.	2023	111	molecular targeted therapy	esophageal adenocarcinoma premalignant lesion	bone morphogenetic protein 2/4	molecular targeted therapy	//	anti-BMP4 VHH; anti-BMP2/4 VHH	saline	in vivo	in vivo organoid model of Barrett’s esophagus	inhibited the generation of columnar epithelium; promoted the generation of neo-squamous epithelium	↑high selectivetiy; ↑high effectivity	//	//	//	//
Cell-penetrable nanobodies (transbodies) that inhibit the tyrosine kinase activity of EGFR leading to the impediment of human lung adenocarcinoma cell motility and survival	L. Tabtimmai et al.	2019	126	molecular targeted therapy	non–small cell lung cancer (NSCLC)	epidermal growth factor receptor (EGFR)	molecular targeted therapy	//	R9-VH18, R9-VHH35, and R9-VH36	EFGR inhibitors: Gefitinib, Elrotinib, and Lapatinib	in vitro	human adenocarcinomic alveolar basal epithelial cells (A549)	inhibited the tyrosine kinase activity of EGFR leading to the impediment of human lung adenocarcinoma cell motility and survival	↓cancer cell migration; ↑cytotoxic for cancer cell;	//	//	//	//
Selective targeting BMP2 and 4 in SMAD4 negative esophageal adenocarcinoma inhibits tumor growth and aggressiveness in preclinical models	S. Li et al.	2022	119	molecular targeted therapy	esophageal adenocarcinoma	bone morphogenetic protein 2/4	molecular targeted therapy	//	anti-BMP4 C4C4; anti-BMP2/4 C8C8	cisplatin	in vitro, in vivo	SMAD4 negaitve primary esophageal adenocarcinoma cell ISO76A	VHHs directed against BMP2/4 hold promise for the treatment of SMAD4 negative EAC	↓chemo-resistant of cancer cells; ↓tumor growth in vivo; ↑overall survival	//	//	//	//
Single domain antibody against carcinoembryonic antigen-related cell adhesion molecule 6 (CEACAM6) inhibits proliferation, migration, invasion and angiogenesis of pancreatic cancer cells	T.M. Cheng et al.	2014	110	molecular targeted therapy	pancreatic cancer	carcinoembryonic antigen-related cell adhesion molecule 6 (CEACAM6)	molecular targeted therapy	//	anti-CEACAM6 VHHs 2A3	chemotherapy drug: gemcitabine	in vitro	Pancreatic cancer cell BxPC3 and Panc1;	2A3 is an ideal candidate for treating tumours that over-express CEACAM6	↑high affinity; ↑high specificity;↓cancer cell proliferation; ↓cancer cell invasion; ↓angiogenesis	//	//	//	//
Efficient tumor targeting by single-domain antibody fragments of camels	V. Cortez-Retamozo et al.	2002	112	molecular targeted therapy	T-cell lymphoma	an overlapping epitope of lysozyme Lys2 and Lys3	molecular targeted therapy	//	anti-Lys2 VHH cAb-Lys2; anti-Lys3 VHH cAb-Lys3	bivalent anti-Lys2 VHH cAb-Lys2; anti-Lys3 VHH cAb-Lys3	in vitro, in vivo	BW-Li variant; 3LL-R variant; tumor metastasis model with 3LL-R	successful and specific in vivo targeting of tumors	↑high affinity; ↑high specificity; ↓Immunogenicity; ↑tumor to organ ratios	high kidney uptake	high liver uptake	//	non-immunogenic
Effective suppression of tumour cells by oligoclonal HER2-targeted delivery of liposomal doxorubicin	A. Farasat et al.	2019	114	molecular targeted therapy	breast cancer	human epidermal growth factor receptor 2 (HER2)	molecular targeted therapy	//	anti-HER2 recombinant VHHs	RR13 conjugated to liposome (VHH-PEG-Lip)	in vitro	HER2-positive human breast cancer cells BT-474, SKBR3; HER2-negative normal human breast cells MCF10A	improving therapeutic efficacy of doxorubicin-loaded immunoliposomes	↑high affinity; ↑high specificity; ↑cytotoxicity	//	//	//	less immunogenic
The engineered anti-GPC3 immunotoxin, HN3-ABD-T20, produces regression in mouse liver cancer xenografts via prolonged serum retention	B.D. Fleming et al.	2020	115	molecular targeted therapy	hepatocellular carcinomas (HCC)	lypican-3 (GPC3)	molecular targeted therapy	//	anti-GPC3 VHHs HN3-ABD-T20	HN3-mPE24; HN3-PE38	in vitro, in vivo	Hep3B; HuH-7 cells; Hep3B nude mice xenografts	albumin binding deimmunized HN3-T20 immunotoxins are high potency therapeutics ready to be evaluated in clinical trials for the treatment of liver cancer	↑high affinity; ↑high specificity; ↑cancer cell proliferation inhibition; ↑serum half-life; ↑tumor regression; ↓immunogenicity	//	//	low toxicity	//
Efficient inhibition of EGFR signalling and of tumour growth by antagonistic anti-EGFR Nanobodies	R. C. Roovers et al.	2006	122	molecular targeted therapy	epidermoid carcinoma	epidermal growth factor receptor (EGFR)	antibody-based therapeutics	//	anti-EGFR VHHs Ia1	control Nanobody VHHs	In vitro, in vivo	human epidermoid squamous carcinoma cell line A431; The cervix adenocarcinoma cell line Hela;	VHHs were effective in delaying the outgrowth of A431-derived solid tumours, he first report describing the successful use of untagged VHHs for the in vivo treatment of solid tumours.	↑binding affinity; ↑high specificity;	//	//	//	//
Nanobody-based CD38-specific heavy chain antibodies induce killing of multiple myeloma and other hematological malignancies	L. Schriewer et al.	2020	123	molecular targeted therapy	multiple myeloma	CD38	molecular targeted therapy	//	anti-CD38 VHHs (WF211-hcAb, MU1067-hcAb, JK36-hcAb)	anti-CD38 monoclonal antibodies daratumumab	in vitro, ex vivo, in vivo	lymphoma cell lines Daudi and CA46; myeloma cell line LP-1	CD38-specific heavy chain antibodies significantly reduced the growth of systemic lymphomas and prolonged survival of tumor bearing SCID mice	↑binding specificity; ↑binding affinity; ↓tumor growth in vivo; ↑survival of mice	//	//	//	//
Anti-MET VHH Pool Overcomes MET-Targeted Cancer Therapeutic Resistance	Z. Su et al.	2019	125	molecular targeted therapy	met positive cancer	hepatocyte growth factor receptor (HGFR) or MET	molecular targeted therapy	//	Anti-MET VHH pool	anti-MET monoclonal antibody 5D5, anti-MET VHH or vehicle control	In vitro, in vivo	HepG2, SK-HEP-1, HCC827, and NIH3T3 cell lines; Tumor xenograft model	VHH pool-based strategy greatly improves MET-targeted therapeutic effects on cancer	↑binding affinity; ↑high specificity; ↑suppresses cancer cell proliferation, viability, and colony formation in vitro; ↑inhibition of tumorigenesis and tumor growth	//	//	//	//
Novel CD7-specific nanobody-based immunotoxins potently enhanced apoptosis of CD7-positive malignant cells	J. Tang et al.	2016	127	molecular targeted therapy	leukemia	CD7	molecular targeted therapy	//	monovalent CD7 VHHs-based immunotoxins PG001; bivalent CD7 VHHs-based immunotoxins PG002	CD7 negative VHHs	In vitro, in vivo	NOD/SCID mice xenotransplants model;	effectively and selectively killed human leukemia cells and significantly prolonged the survival of treated mice	↑promoting apoptosis of tumor cells; ↑binding affinity; ↑binding specificity; ↑mouse survival.	//	//	no obvious toxicity	//
Enhancement of NK Cell Antitumor Effector Functions Using a Bispecific Single Domain Antibody Targeting CD16 and the Epidermal Growth Factor Receptor	E.C. Toffoli et al.	2021	128	molecular targeted therapy	colorectal cancer	CD16 (FcRγIII) on NK cells and the epidermal growth factor receptor (EGFR)	molecular targeted therapy	//	anti-CD16-anti-EGFR bispecific VHHs;	CD16 mouse anti-human mAb labeled with BV786	in vitro, ex vivo	epidermoid carcinoma cell line A431; colonrectal cancer cell line HCT116; melanoma cell lines Colo829	higher levels of cytotoxicity were found against patient-derived metastatic CRC cells in the presence of the bispecific VHH and autologous peripheral blood mononuclear cells or allogeneic CD16 expressing NK cells.	↑binding specificity; ↑binding affinity;↑activity of NK cells; ↑tumor control; ↓tumor growth;	//	//	//	//
Generation of a safe and efficacious llama single-domain antibody fragment (VHH) targeting the membrane-proximal region of 4-1BB for engineering therapeutic bispecific antibodies for cancer	T. Zhai et al.	2021	134	molecular targeted therapy	ovarian cancer	PD-L1; 4-1BB	molecular targeted therapy	//	anti-PD-L1/4-1BB bispecific candidate (PM1003)	anti-4-1BB mAbs Urelumab and Utomilumab	In vitro, in vivo	CT-26-huPD-L1; MC-38-huPD-L1 cells; CHO-huPD-L1; CHO-hu4-1BB; hPD-L1 knock-in tumor mouse model; CT-26-huPD-L1 tumor mode; MC38-huPD-L1 tumor model	potent inhibition of PD-L1 activity with 4-1BB agonism upon cross-bridging with PD-L1 in vitro. Antitumor activity with minimal toxicity was found in vivo.	↑binding specificity; ↑binding affinity; ↓tumor growth; ↓hepatotoxicity;	//	//	minimal toxicity	//
A novel intracellular nanobody against HPV16 E6 oncoprotein	W. Zhang et al.	2021	135	molecular targeted therapy	cervical cancer	HPV16 E6	molecular targeted therapy	//	HPV16 E6-specific VHH Nb9	anti-HPV16 E6 Nb9; anti-HPV16 E7 VHH2; commercial anti-HPV16 E6 antibody	In vitro, in vivo	HPV16-positive cell SiHa; HPV16-positive cell CaSki; HPV16-negative cell C33A; HPV16 tumor mouse models	Nb9 could be a useful inhibitor for HPV16 E6 function and particularly appropriate for the treatment of HPV-associated disease.	↑binding affinity; ↑binding specificity; ↓tumor volume; ↓tumor progression in vivo	//	//	//	//
Nanobody against the E7 oncoprotein of human papillomavirus 16	S. Li et al.	2019	120	molecular targeted therapy	cervical cancer	HPV16E7	molecular targeted therapy	//	anti- HPV16E7 VHH Nb2	E7 negative VHH	in vitro	HPV16 positive cervical epithelial tumour cell lines CaSki and SiHa; the HPV16-negative human cervical squamous carcinoma cell line C33 A;	Nb2 as an intracellular antibody directed towards HPV oncoprotein E7 has great promise in applications for the therapy of HPV16-associated disease	↑binding affinity; ↑binding specificity; ↑inhibition of tumor cell growth;	//	//	//	//
